# Supplementary material for: Efficacy of a 12-Week Simeprevir Plus Peginterferon/Ribavirin (PR) Regimen in Treatment-Naïve Patients with Hepatitis C Virus (HCV) Genotype 4 (GT4) Infection and Mild-To-Moderate Fibrosis Displaying Early On-Treatment Virologic Response
Source: PLoS One. 2017 Jan 5;12(1):e0168713. doi: 10.1371/journal.pone.0168713 (PMC5215882; doi:10.1371/journal.pone.0168713)
Supplement: S1 Dataset — (ZIP) [file pone.0168713.s002.zip]

Archive with 35 entries (35 files):
- TSFAE12TDG4.rtf
- tsfae15tdg4all.rtf
- tsfae15tdg4gt12.rtf
- tsfae15tdg412.rtf
- TSFLAB01-GT.rtf
- TSFLAB02-GT.rtf
- TSIDEM01.rtf
- TSIDEM01A.rtf
- TSIDEM01B.rtf
- TSIDEM02.rtf
- TSIDEM02B.rtf
- TSIDS01.rtf
- TSIDS05A.rtf
- LEFVF01.rtf
- LSIDS01.rtf
- Minimal Data Set for GT4 PLoS ONE.xlsx
- TEFSUB01.rtf
- TEFSUB02.rtf
- TEFSUB04C.rtf
- TEFSVR02aA.rtf
- TEFSVR03.rtf
- TEFSVR03A.rtf
- TEFVF01.rtf
- TSFAE01TDG4.rtf
- tsfae01tdg4all.rtf
- tsfae01tdg4gt12.rtf
- tsfae01tdg412.rtf
- TSFAE02G4ET.rtf
- tsfae02tdg4all.rtf
- tsfae02tdg4gt12.rtf
- tsfae02tdg412.rtf
- tsfae05tdg4all.rtf
- tsfae05tdg4gt12.rtf
- tsfae05tdg412.rtf
- TSFAE11TDG4.rtf
