# Supplementary material for: Efficacy of a 12-Week Simeprevir Plus Peginterferon/Ribavirin (PR) Regimen in Treatment-Naïve Patients with Hepatitis C Virus (HCV) Genotype 4 (GT4) Infection and Mild-To-Moderate Fibrosis Displaying Early On-Treatment Virologic Response
Source: PLoS One. 2017 Jan 5;12(1):e0168713. doi: 10.1371/journal.pone.0168713 (PMC5215882; doi:10.1371/journal.pone.0168713)
Supplement: S1 Dataset — (ZIP) [file pone.0168713.s002.zip › Minimal Data Set for GT4 PLoS ONE.xlsx]

## Sheet: Sheet1
Minimal Data Set for SMV+PR 12wk Genotype 4 manuscript - Table of Contents
Filename	Description	Present for GT4?
Efficacy
LEFVF01	Subjects with Failure; Intent-to-treat	Yes
LSIDS01	Subjects who were not treated; All Subjects	Yes
TEFSUB01	Sustained Virologic Response 12 Weeks After the Planned End of Treatment (SVR12) - by Stratification Factors; Intent-to-treat	Yes
TEFSUB02	Sustained Virologic Response 12 Weeks After the Planned End of Treatment - Subgroup Analyses for Early Response Parameters. Intent-to-treat	Yes
TEFSUB04C	Efficacy Endpoints according to IL28B genotype	Yes
TEFSVR02aA	Primary Endpoint: Sustained Virologic Response 12 Weeks After the Planned End of Treatment (SVR12); Intent-to-treat	Yes
TEFSVR03	Sustained Virologic Response, 4, 12 and 24 Weeks After the Planned End of Treatment - Details; Intent-to-treat	Yes
TEFSVR03A	Reasons for not Achieving Sustained Virologic Response 12 Weeks After the Planned End of Treatment (SVR12); Intent-to-treat	Yes
TEFVF01	On-Treatment and Post-Treatment Failure; Intent-to-treat	Yes
TSIDEM01	Demographic Parameters	Yes
TSIDEM01A	Demographic Characteristics; Intent-to-treat	Yes
TSIDEM01B	Demographic Characteristics by Subgroups of Interest; Intent-to-treat	Yes
TSIDEM02	Baseline Disease Characteristics; Intent-to-treat	Yes
TSIDEM02B	Baseline Disease Characteristics by Subgroups of Interest; Intent-to-treat	Yes
TSIDS01	Subjects Screened and Treated; All Subjects	Yes
TSIDS05A	Completions and Discontinuations of Study Medication and Reasons for Discontinuation; Intent-to-treat	Yes
Safety
TSFAE01TDG4	Adverse Event Summary Table (12-week and >12-week groups)	Yes
tsfae01tdg4all	Adverse Event Summary Table; Intent-to-treat (all patients)	Yes
tsfae01tdg4gt12	Adverse Event Summary Table; Intent-to-treat (>12-week group)	Yes
tsfae01tdg412	Adverse Event Summary Table; Intent-to-treat (12-week group)	Yes
tsfae02tdg4all	Number (%) of Patients with Adverse Events, Intent-to-treat (all patients)	Yes
TSFAE02G4ET	Number (pcnt) of Genotype 4 Subjects with Selected Adverse Events During Entire Treatment Phase, Intent-to-treat (12-week and >12-week groups)	Yes
tsfae02tdg4gt12	Number (%) of Patients with Adverse Events, Intent-to-treat (>12-week group)	Yes
tsfae02tdg412	Number (%) of Patients with Adverse Events, Intent-to-treat (12-week group)	Yes
tsfae05tdg4all	Number (%) of Patients with Adverse Events by Worst WHO Toxicity Grade, Intent-to-treat (all patients)	Yes
tsfae05tdg4gt12	Number (%) of Patients with Adverse Events by Worst WHO Toxicity Grade, Intent-to-treat (>12-week group)	Yes
tsfae05tdg412	Number (%) of Patients with Adverse Events by Worst WHO Toxicity Grade, Intent-to-treat (12-week group)	Yes
TSFAE11TDG4	Number and percentage of GT4 Subjects with Adverse Events at Least Possibly Related to Ribavirin by Worst WHO Toxicity Grade - Intent-to-treat	Yes
TSFAE12TDG4	Number and percentage of GT4 Subjects with Adverse Events at Least Possibly Related to Pegylated Interferona-2a by Worst WHO Toxicity Grade - Intent-to-treat	Yes
tsfae15tdg4all	Number (pcnt) of Genotype 4 Subjects with Adverse Events of Special/Clinical Interest by Preferred Term, Intent-to-treat	Yes
tsfae15tdg4gt12	Number (pcnt) of Genotype 4 Subjects with Adverse Events of Special/Clinical Interest by Preferred Term, Intent-to-treat	Yes
tsfae15tdg412	Number (pcnt) of Genotype 4 Subjects with Adverse Events of Special/Clinical Interest by Preferred Term, Intent-to-treat	Yes
TSFLAB01-GT	Actual Laboratory Parameters values by Analysis Timepoint (Entire Treatment Phase); Intent-to-treat	Yes
TSFLAB02-GT	Change from Baseline in Laboratory Parameters by Analysis Timepoint (Entire Treatment Phase); Intent-to-treat	Yes
